# Supplementary material
Source: PubMed Central journal article supplement (PMC5860427)

Web Material

Web Figure 1. Unadjusted model of ASD diagnosis risk

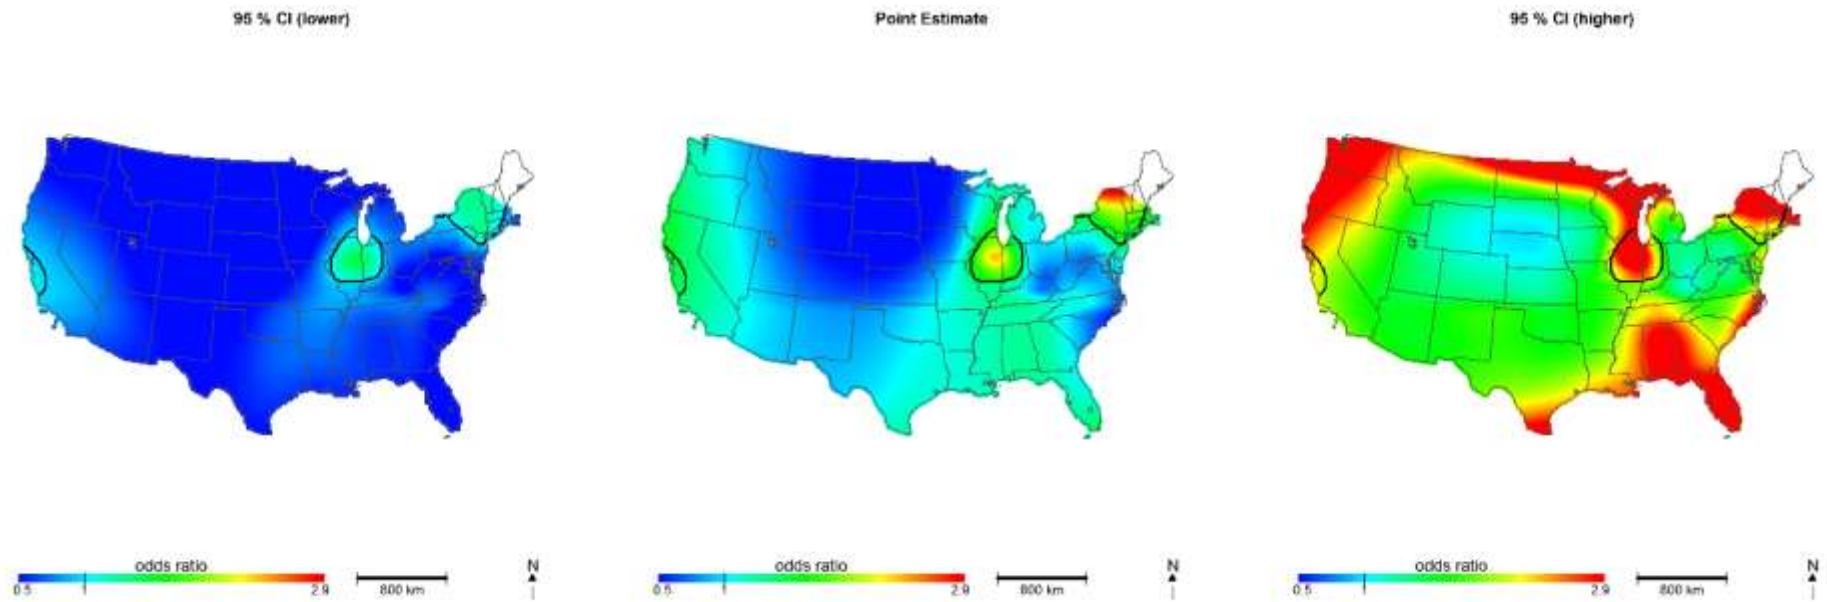

Web Figure 2. ASD diagnosis risk adjusted for sex

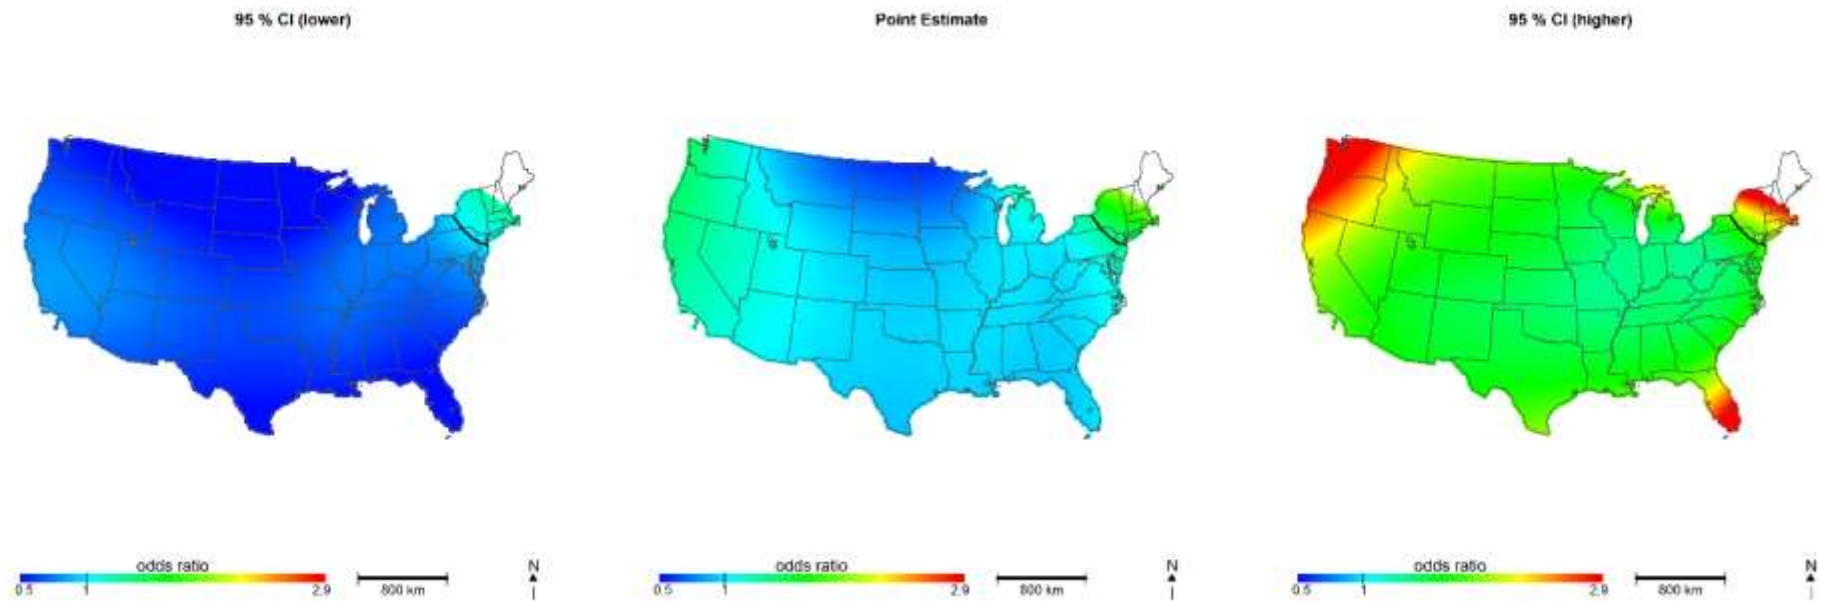

Web Figure 3. Geographic distribution of male sex

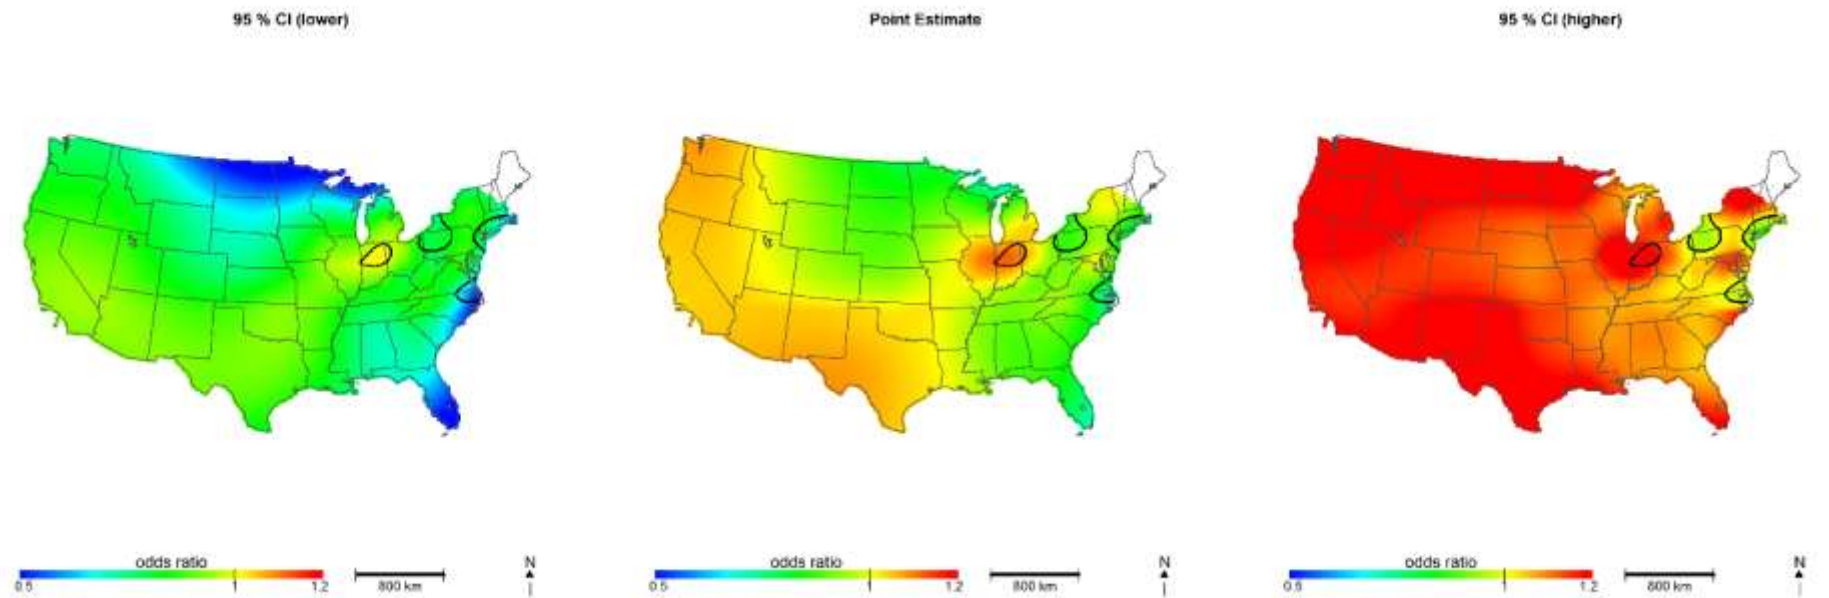

Web Figure 4. ASD diagnosis risk adjusted for gestational diabetes

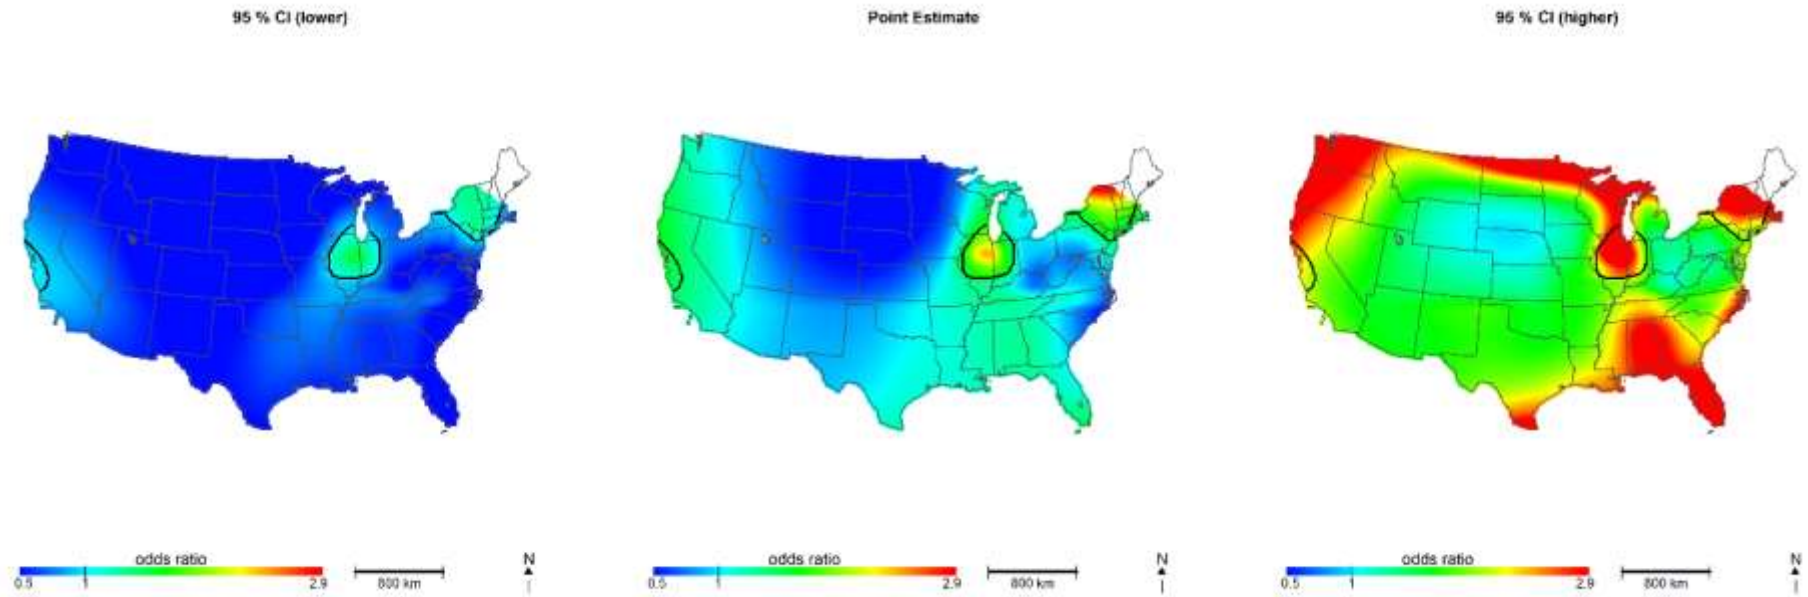

Web Figure 5. Geographic distribution of gestational diabetes

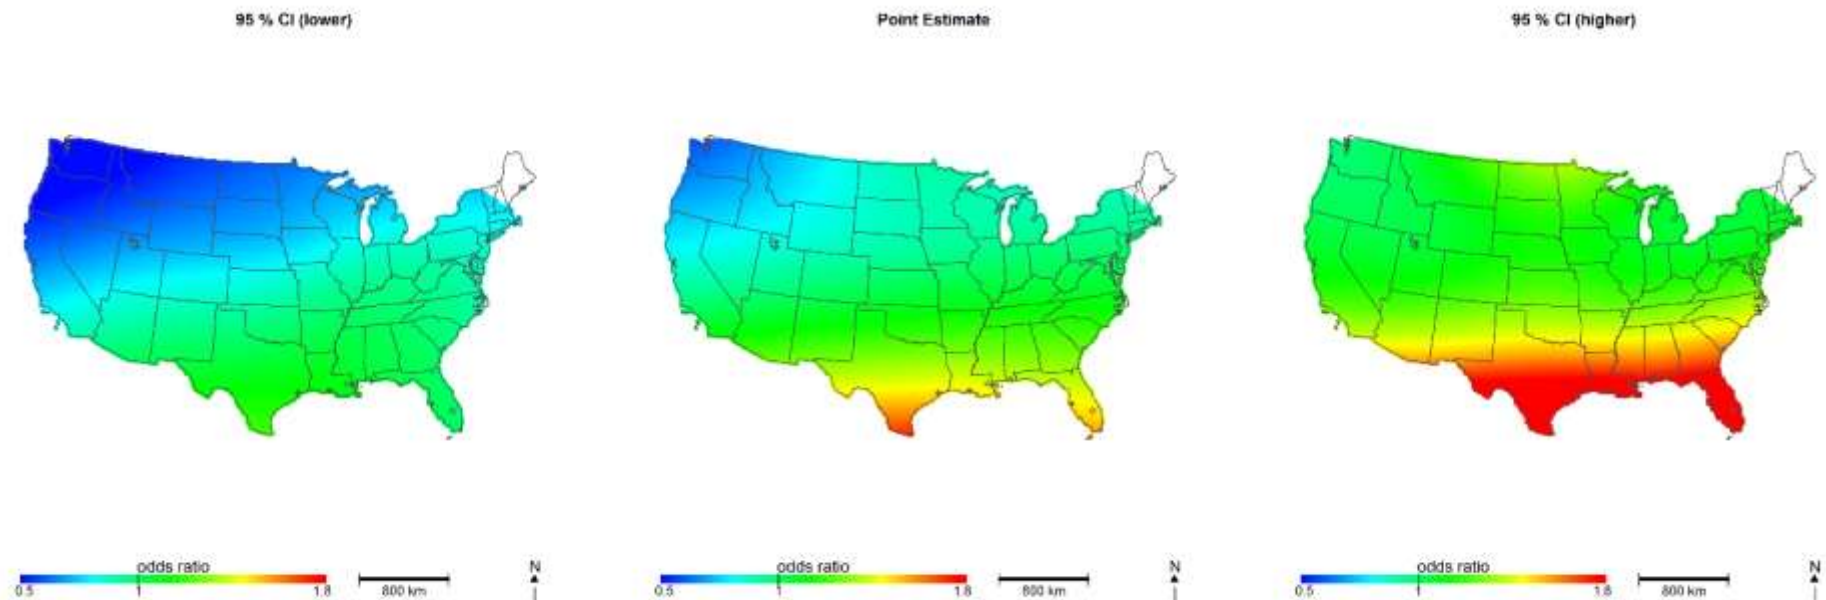

Supplement: kwx158vieirawebmaterialfinal.pdf [file kwx158vieirawebmaterialfinal.pdf]
